# Supplementary material for: Oxidative C–C/C–X coupling in organometallic nickel complexes: insights from DFT
Source: Royal Society of Chemistry journal article supplement (doi:10.1039/d2nj02480b), 2022-01-01
Supplement: d2nj02480b1.pdf [file d2nj02480b1.pdf]

## **Supporting Information**

### **Oxidative C-C/C-X Coupling in Organometallic Nickel Complexes:**

#### **Insights from DFT**

Gopal Sabapathi<sup>a</sup>, and Ponnambalam Venuvanalingam<sup>a\*</sup>

<sup>a</sup>Theoretical and Computational Chemistry Laboratory, School of Chemistry, Bharathidasan University, Tiruchirappalli 620024

*\*corresponding author*

Tiruchirappalli – 620 024, India.

Mobile: +91 9894364133 Fax: +91 431 2407045

E-mail: [venuvanalingam@yahoo.com](mailto:venuvanalingam@yahoo.com)

## Contents

|                  |                                                                                    |    |
|------------------|------------------------------------------------------------------------------------|----|
| <b>Fig. S1</b>   | Optimized geometries of $2^+$ complex intermediates, and transition states         | S3 |
| <b>Fig.S2</b>    | Optimized geometries of $3^{2+}$ complex intermediates, and transition states.     | S4 |
| <b>Fig.S3</b>    | Optimized geometries of $3^{2+}$ complex intermediates, and transition states.     | S5 |
| <b>Table. S1</b> | NPA charges on Ni and selected atoms in the selected complexes at B3LYP/BS1 level. | S6 |
| <b>Table. S2</b> | Wiberg bond indices for selected bonds in nickel complexes at B3LYP/BS1            | S7 |

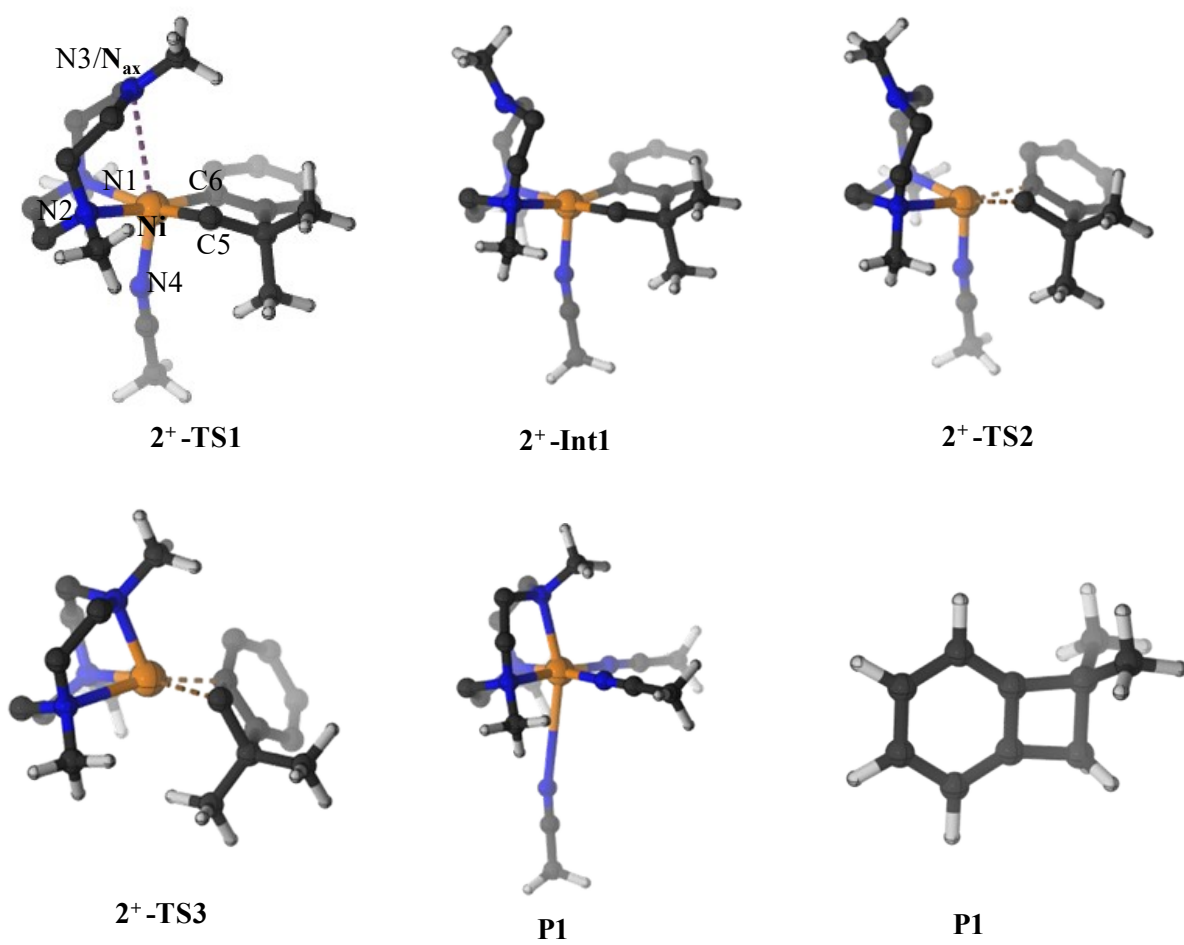

**Fig. S1.** Optimized geometries of  $2^+$  complex intermediates, and transition states.

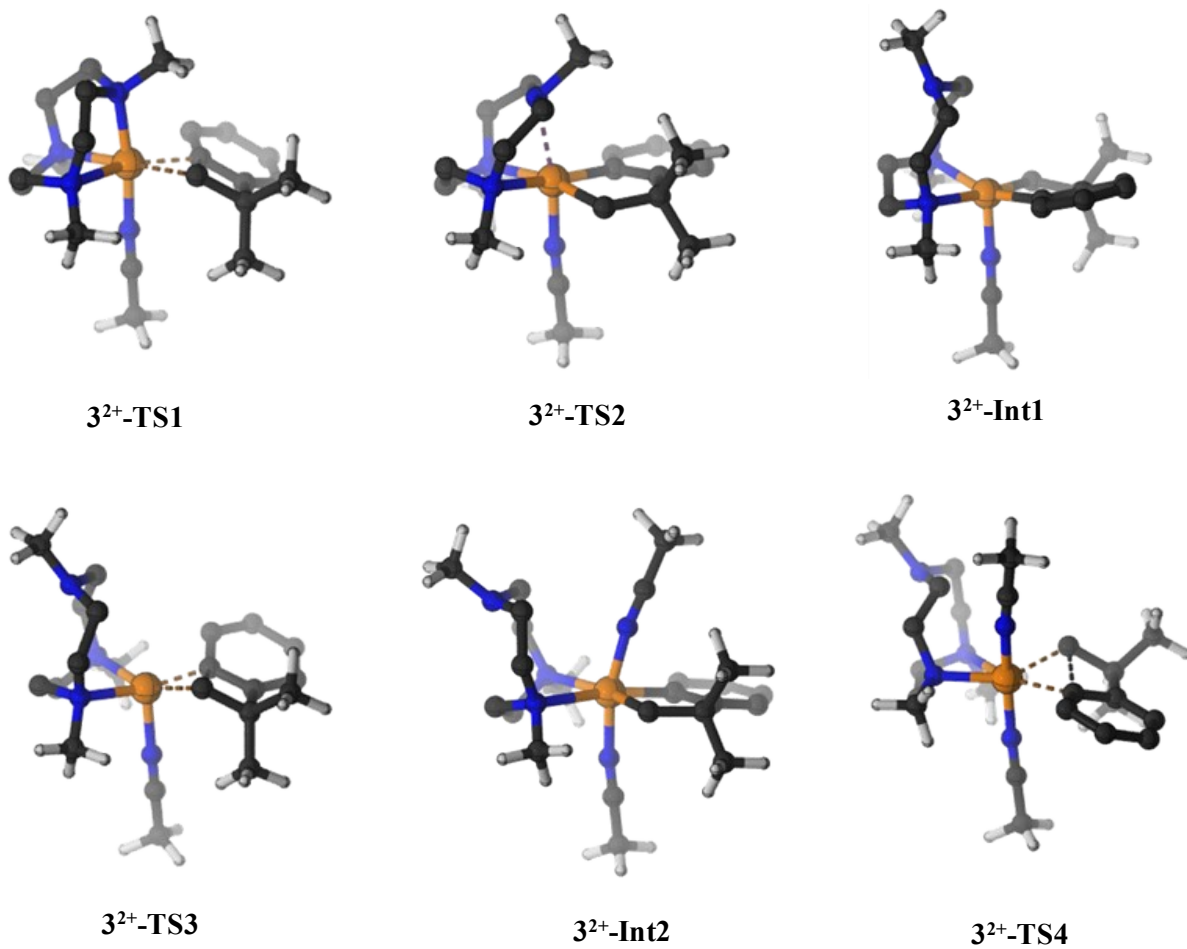

**Fig. S2.** Optimized geometries of  $3^{2+}$  complex intermediates, and transition states.

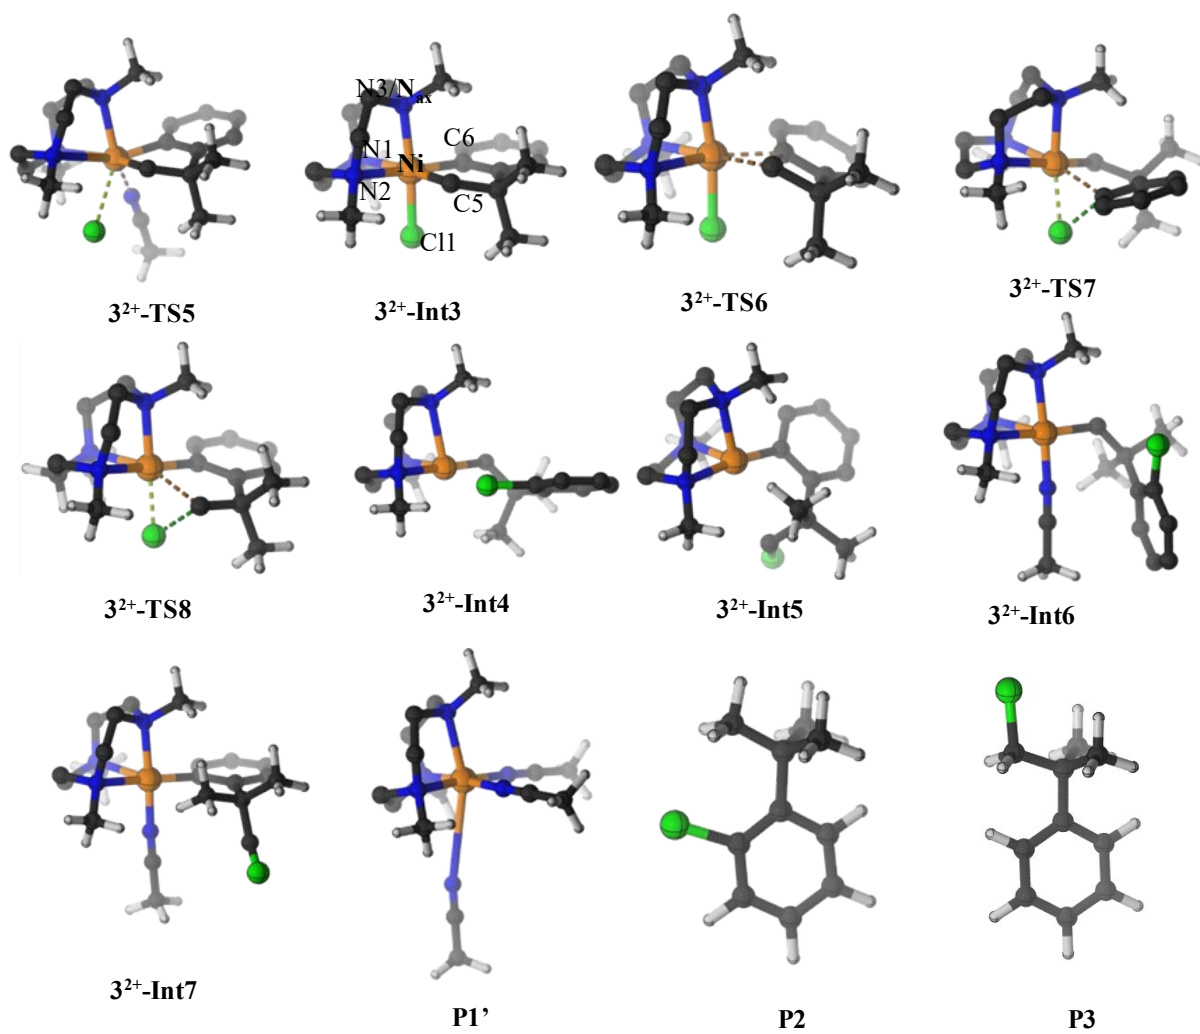

**Fig. S3.** Optimized geometries of  $3^{2+}$  complex intermediates, and transition states.

**Table S1.** NPA charges on selected atoms in the complexes and intermediates.

|                            | Ni    | N1     | N2     | N3     | N4/Cl             | C5     | C6     |
|----------------------------|-------|--------|--------|--------|-------------------|--------|--------|
| <b>1</b>                   | 0.332 | -0.549 | -0.544 | -0.585 | -                 | -0.658 | -0.199 |
| <b>2<sup>+</sup></b>       | 0.718 | -0.558 | -0.554 | -0.546 | -                 | -0.565 | -0.200 |
| <b>2<sup>+</sup>-Int1</b>  | 0.686 | -0.556 | -0.558 | -0.584 | -0.382            | -0.531 | -0.264 |
| <b>2<sup>+</sup>-TS2</b>   | 0.598 | -0.580 | -0.569 | -0.581 | -0.400            | -0.521 | -0.143 |
| <b>2<sup>+</sup>-TS3</b>   | 0.789 | -0.565 | -0.568 | -0.574 | -                 | -0.588 | -0.193 |
| <b>3<sup>2+</sup></b>      | 0.481 | -0.521 | -0.524 | -0.439 | -0.351            | -0.320 | -0.200 |
| <b>3<sup>2+</sup>-TS1</b>  | 0.579 | -0.545 | -0.510 | -0.472 | -0.371            | -0.588 | -0.193 |
| <b>3<sup>2+</sup>-TS2</b>  | 0.511 | -0.529 | -0.522 | -0.522 | -0.354            | -0.338 | -0.041 |
| <b>3<sup>2+</sup>-Int1</b> | 0.525 | -0.534 | -0.543 | -0.519 | -0.364            | -0.332 | 0.008  |
| <b>3<sup>2+</sup>-TS3</b>  | 0.573 | -0.526 | -0.519 | -0.519 | -0.404            | -0.291 | -0.052 |
| <b>3<sup>2+</sup>-Int2</b> | 0.451 | -0.507 | -0.507 | -0.582 | -0.371            | -0.280 | -0.052 |
| <b>3<sup>2+</sup>-TS4</b>  | 0.512 | -0.471 | -0.572 | -0.571 | -0.389            | -0.238 | -0.065 |
| <b>3<sup>2+</sup>-TS5</b>  | 0.494 | -0.546 | -0.538 | -0.470 | -0.358/<br>-0.570 | -0.298 | -0.002 |
| <b>3<sup>2+</sup>-Int3</b> | 0.373 | -0.528 | -0.530 | -0.479 | -0.245            | -0.359 | -0.014 |
| <b>3<sup>2+</sup>-TS6</b>  | 0.467 | -0.549 | -0.519 | -0.508 | -0.327            | -0.400 | -0.073 |
| <b>3<sup>2+</sup>-TS7</b>  | 0.413 | -0.545 | -0.548 | -0.524 | -0.030            | -0.497 | -0.022 |
| <b>3<sup>2+</sup>-TS8</b>  | 0.388 | -0.548 | -0.554 | -0.513 | -0.132            | -0.249 | -0.118 |
| <b>3<sup>2+</sup>-Int4</b> | 0.449 | -0.569 | -0.524 | -0.565 | -0.128            | -0.624 | -0.031 |
| <b>3<sup>2+</sup>-Int5</b> | 0.566 | -0.552 | -0.571 | -0.524 | -0.045            | -0.400 | -0.184 |
| <b>3<sup>2+</sup>-Int6</b> | 0.495 | -0.557 | -0.565 | -0.529 | -0.367            | -0.594 | -0.044 |
| <b>3<sup>2+</sup>-Int7</b> | 0.466 | -0.554 | -0.559 | -0.517 | -0.357            | -0.420 | -0.152 |

For atom numbering see Fig. S1 and S3

**Table S2.** Wiberg bond indices for selected bonds in nickel complexes at B3LYP/BS1

|                            | Ni-N1 | Ni-N2 | Ni-N3 | Ni-N4/Cl | Ni-C5 | Ni-C6 | C5/Cl-C6/Cl |
|----------------------------|-------|-------|-------|----------|-------|-------|-------------|
| <b>1</b>                   | 0.221 | 0.233 | 0.015 | -        | 0.675 | 0.662 | 0.159       |
| <b>2<sup>+</sup></b>       | 0.218 | 0.224 | 0.227 | -        | 0.565 | 0.552 | 0.270       |
| <b>2<sup>+</sup>-TS1</b>   | 0.229 | 0.233 | 0.011 | 0.289    | 0.557 | 0.559 | 0.266       |
| <b>2<sup>+</sup>-Int1</b>  | 0.231 | 0.233 | 0.014 | 0.300    | 0.569 | 0.544 | 0.270       |
| <b>2<sup>+</sup>-TS2</b>   | 0.194 | 0.172 | 0.016 | 0.305    | 0.288 | 0.286 | 0.702       |
| <b>2<sup>+</sup>-TS3</b>   | 0.190 | 0.148 | 0.181 | -        | 0.268 | 0.291 | 0.733       |
| <b>3<sup>2+</sup></b>      | 0.266 | 0.254 | 0.412 | 0.449    | 0.659 | 0.651 | 0.104       |
| <b>3<sup>2+</sup>-TS1</b>  | 0.213 | 0.320 | 0.453 | 0.467    | 0.332 | 0.339 | 0.587       |
| <b>3<sup>2+</sup>-TS2</b>  | 0.266 | 0.250 | 0.396 | 0.433    | 0.663 | 0.650 | 0.010       |
| <b>3<sup>2+</sup>-Int1</b> | 0.257 | 0.272 | 0.089 | 0.422    | 0.668 | 0.752 | 0.055       |
| <b>3<sup>2+</sup>-TS3</b>  | 0.266 | 0.365 | 0.096 | 0.402    | 0.320 | 0.634 | 0.451       |
| <b>3<sup>2+</sup>-Int2</b> | 0.248 | 0.255 | 0.006 | 0.439    | 0.674 | 0.661 | 0.064       |
| <b>3<sup>2+</sup>-TS4</b>  | 0.408 | 0.045 | 0.009 | 0.465    | 0.349 | 0.457 | 0.447       |
| <b>3<sup>2+</sup>-TS5</b>  | 0.087 | 0.247 | 0.325 | 0.367    | 0.572 | 0.680 | 0.011       |
| <b>3<sup>2+</sup>-Int3</b> | 0.244 | 0.232 | 0.328 | 0.794    | 0.666 | 0.654 | 0.114       |
| <b>3<sup>2+</sup>-TS6</b>  | 0.185 | 0.294 | 0.360 | 0.842    | 0.317 | 0.305 | 0.638       |
| <b>3<sup>2+</sup>-TS7</b>  | 0.179 | 0.245 | 0.253 | 0.556    | 0.341 | 0.785 | 0.658       |
| <b>3<sup>2+</sup>-TS8</b>  | 0.255 | 0.151 | 0.300 | 0.632    | 0.741 | 0.309 | 0.521       |
| <b>3<sup>2+</sup>-Int4</b> | 0.233 | 0.290 | 0.138 | -        | 0.779 | -     | 0.965       |
| <b>3<sup>2+</sup>-Int5</b> | 0.252 | 0.276 | 0.187 | -        | -     | 0.771 | 1.011       |
| <b>3<sup>2+</sup>-Int6</b> | 0.219 | 0.116 | 0.293 | 0.429    | 0.777 | -     | 1.036       |
| <b>3<sup>2+</sup>-Int7</b> | 0.246 | 0.112 | 0.324 | 0.420    | -     | 0.743 | 0.990       |

For atom numbering see Fig. S1 and S3
